# Supplementary material for: In-Site Growth of Efficient NiFeOOH/NiFe-LDH Electrodes: A Streamlined One-Step Methodology
Source: MDPI journal article supplement (doi:10.3390/chemistry6020017), 2024-03-31
Supplement: s1 [file s1]

Electronic Supplementary Information

**In-Site Grown of an Efficient NiFeOOH/NiFe-LDH Based Oxygen-Evolving  
Electrode via A Simple One-Step Strategy**

Jing Ning <sup>1,2,3,†</sup>, Li Xu <sup>1,2,3,4,†</sup>, Wei Xu <sup>4</sup>, Guizhen Li <sup>4</sup> and Wen Zhang <sup>1,2,3,\*</sup>

<sup>1</sup> School of Chemical Engineering and Technology, Tianjin University, Tianjin 300350, China;  
2021207014@tju.edu.cn (J. N.); xuli620@tju.edu.cn (L. X.)

<sup>2</sup> National Industry-Education Integration Platform of Energy Storage, Tianjin University,  
Tianjin 300350, China

<sup>3</sup> Tianjin Key Laboratory of Membrane Science and Desalination Technology, Tianjin 300350,  
China

<sup>4</sup> Tianjin Mainland Hydrogen Equipment Co., Ltd., Tianjin 301609, China; xuwei@cnthe.cn  
(W. X.); liguizhen@cnthe.cn (G. L.)

\* Correspondence: zhang\_wen@tju.edu.cn

† Jing Ning and Li Xu contributed equally to this work.

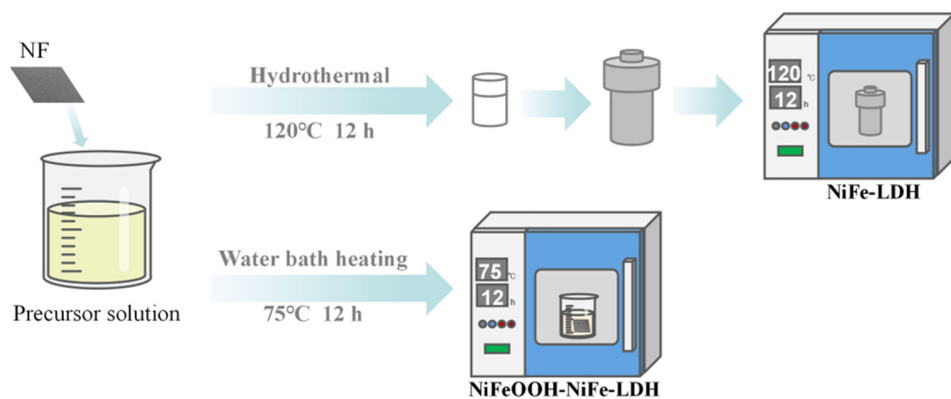

**Figure S1.** Synthesis methods for experimental electrodes.

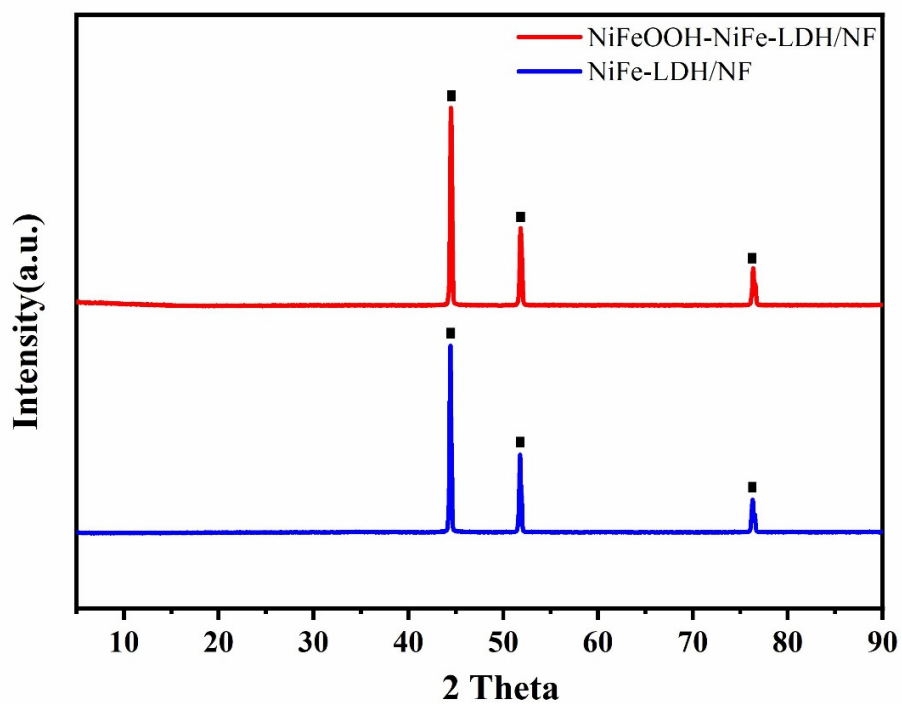

**Figure S2.** XRD pattern of NiFeOOH-NiFe-LDH/NF and NiFe-LDH/NF.

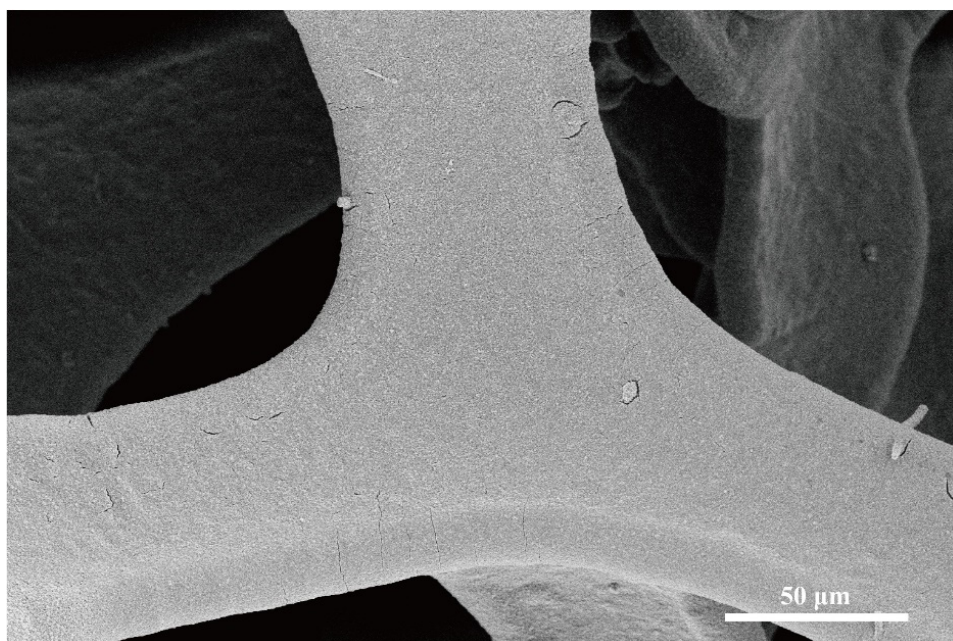

**Figure S3.** SEM images of NiFeOOH-NiFe-LDH/NF at low magnification

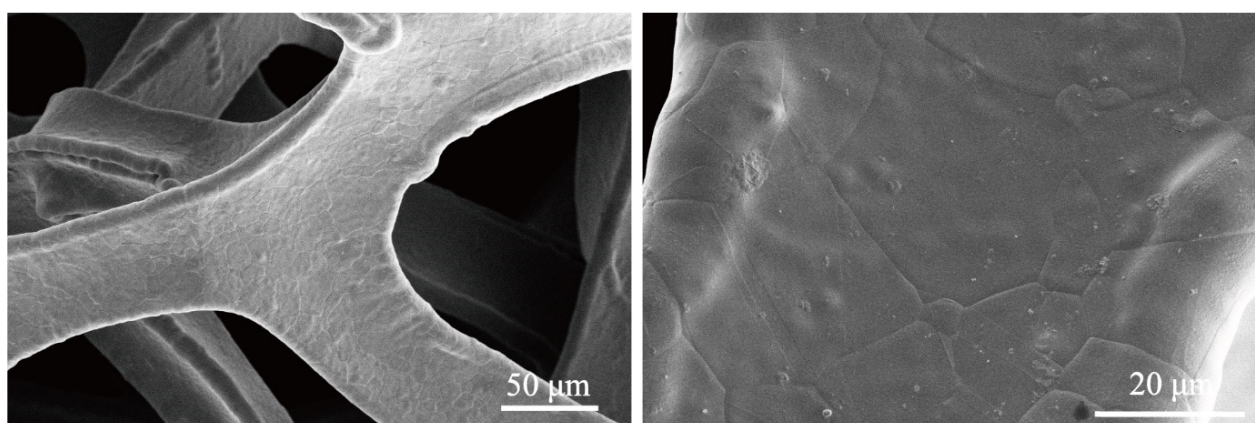

**Figure S4.** SEM images of NF.

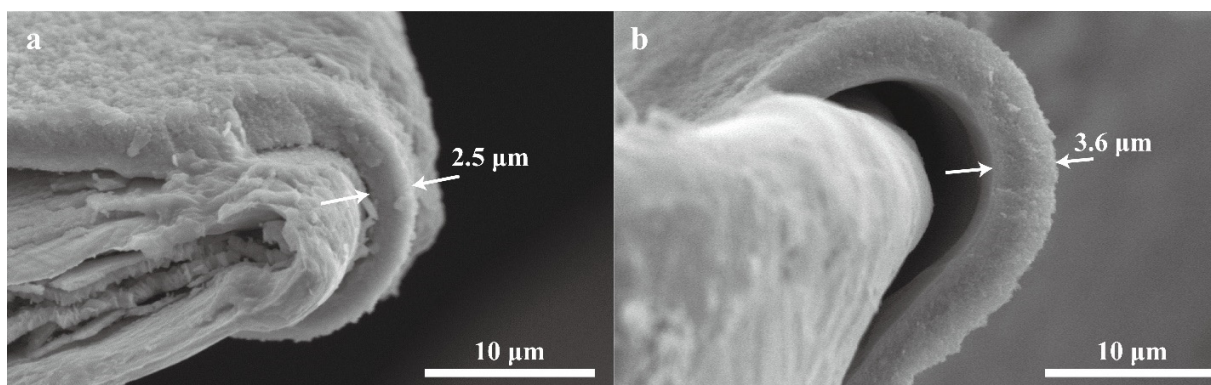

**Figure S5.** SEM image of the cross-section of the catalytic layer (a) NiFeOOH-NiFe-LDH/NF, (b) NiFe-LDH/NF.

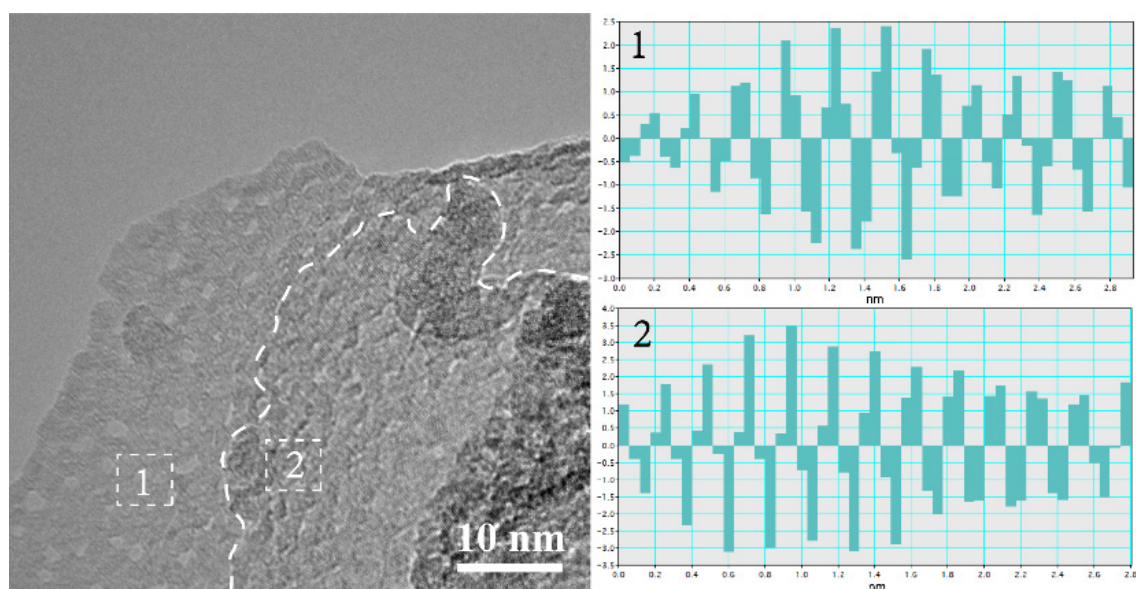

**Figure S6.** Calculation of lattice stripes corresponding to two phase frame selection positions.

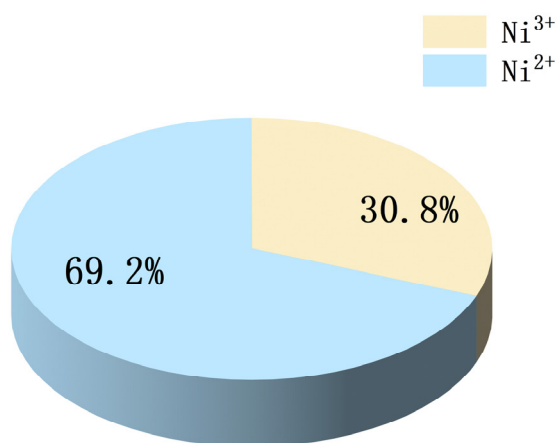

**Figure S7.** Percentage of Ni<sup>2+</sup> and Ni<sup>3+</sup> of NiFeOOH-NiFe-LDH

**Table S1.** The ECSA and Cdl values of different catalysts

|                  | ECSA(cm <sup>2</sup> ) | Cdl (mF · cm <sup>-2</sup> ) |
|------------------|------------------------|------------------------------|
| NiFeOOH-NiFe-LDH | 179.75                 | 7.19                         |
| NiFe-LDH         | 100.50                 | 4.02                         |
| IrO <sub>2</sub> | 69.50                  | 2.78                         |
| NF               | 34.75                  | 1.39                         |

**Table S2.** The comparisons between NiFeOOH-NiFe-LDH and NiFe-LDH

|                                 | NiFeOOH-NiFe-LDH                                      | NiFe-LDH            |
|---------------------------------|-------------------------------------------------------|---------------------|
| Synthesis temperature           | 75 °C                                                 | 120 °C              |
| Material composition            | (Fe <sub>0.67</sub> Ni <sub>0.33</sub> )OOH, NiFe-LDH | NiFe-LDH            |
| Ni elemental form               | Ni <sup>3+</sup> , Ni <sup>2+</sup>                   | Ni <sup>2+</sup>    |
| Fe elemental form               | FeOOH, Fe(OH) <sub>3</sub>                            | Fe(OH) <sub>3</sub> |
| Ov content                      | 9.84%                                                 | 6.16%               |
| Overpotential $\eta_{100}$ (mV) | 227                                                   | 257                 |
| Onset potential (V)             | 1.337                                                 | 1.343               |
